1 Article

# 2 The Patchy Distribution of Restriction-Modification 3 System Genes and the Conservation of Orphan 4 Methyltransferases in Halobacteria

5 Matthew S. Fullmer<sup>1,2,§</sup>, Matthew Ouellette<sup>1,§</sup>, Artemis S. Louyakis<sup>1,§</sup>, R. Thane Papke<sup>1\*</sup>, J. Peter  
6 Gogarten<sup>1\*</sup>

7 <sup>1</sup> Department of Molecular and Cell Biology, University of Connecticut, Storrs, CT, USA

8 <sup>2</sup> Present Address: Bioinformatics Institute, School of Biological Sciences, The University of Auckland,  
9 Auckland, New Zealand

10 <sup>§</sup> These authors contributed equally

11 <sup>\*</sup> Correspondence: [thane@uconn.edu](mailto:thane@uconn.edu); [gogarten@uconn.edu](mailto:gogarten@uconn.edu)

12 Received: date; Accepted: date; Published: date

13 **Abstract:** Restriction-modification (RM) systems in Bacteria are implicated in multiple biological  
14 roles ranging from defense against parasitic genetic elements, to selfish addiction cassettes, and  
15 barriers to gene transfer and lineage homogenization. In Bacteria, DNA-methylation without  
16 cognate restriction also plays important roles in DNA replication, mismatch repair, protein  
17 expression, and in in biasing DNA uptake. Little is known about archaeal RM systems and DNA  
18 methylation. To elucidate further understanding for the role of RM systems and DNA methylation  
19 in Archaea, we undertook a survey of the presence of RM system genes and related genes, including  
20 orphan DNA methylases, in the halophilic archaeal class Halobacteria. Our results reveal that some  
21 orphan DNA methyltransferase genes were highly conserved among lineages indicating an  
22 important functional constraint, whereas RM systems demonstrated patchy patterns of presence  
23 and absence. This irregular distribution is due to frequent horizontal gene transfer and gene loss, a  
24 finding suggesting that the evolution and life cycle of RM systems may be best described as that of  
25 a selfish genetic element. A putative target motif (CTAG) of one of the orphan methylases was  
26 underrepresented in all of the analyzed genomes, whereas another motif (GATC) was  
27 overrepresented in most of the haloarchaeal genomes, particularly in those that encoded the cognate  
28 orphan methylase.

29 **Keywords:** HGT, Restriction, Methylation, Gene Transfer, Selfish Genes, Archaea, Haloarchaea,  
30 DNA methylase, epigenetics

31 **Funding:** This work was supported through grants from the Binational Science Foundation (BSF  
32 2013061); the National Science Foundation (NSF/MCB 1716046) within the BSF-NSF joint research  
33 program; and NASA exobiology (NNX15AM09G, and 80NSSC18K1533).

## 34 1. Introduction

35 DNA methyltransferases (MTases) are enzymes which catalyze the addition of a methyl group  
36 to a nucleotide base in a DNA molecule. These enzymes will methylate either adenine, producing  
37 N6-methyladenine (6mA), or cytosine, producing either N4-methylcytosine (4mC) or C5-  
38 methylcytosine (5mC), depending on the type of MTase enzyme [1]. DNA methyltransferases  
39 typically consist of three types of protein domains: an S-adenosyl-L-methionine (AdoMet) binding  
40 domain which obtains the methyl group from the co-factor AdoMet, a target recognition domain  
41 (TRD) which binds the enzyme to the DNA strand at a short nucleotide sequence known as the  
42 recognition sequence, and a catalytic domain which transfers the methyl group from AdoMet to a

43 nucleotide at the recognition sequence [2]. The order in which these domains occur in an MTase varies  
44 and can be used to classify the enzymes into the subtypes of  $\alpha$ ,  $\beta$ ,  $\gamma$ ,  $\delta$ ,  $\epsilon$ , and  $\zeta$  MTases [3–5].  
45

46 In bacteria and archaea, MTases are often components of restriction-modification (RM) systems,  
47 in which an MTase works alongside a cognate restriction endonuclease (REase) that targets the same  
48 recognition site. The REase will cleave the recognition site when it is unmethylated, but the DNA will  
49 escape cutting when the site has been methylated by the MTase; this provides a self-recognition  
50 system to the host where it differentiates between its own methylated DNA and that of unmethylated,  
51 potentially harmful foreign DNA that is then digested by the host's REase [6–8]. RM systems have  
52 also been described as addiction cassettes akin to toxin-antitoxin systems, in which post-  
53 segregational killing occurs when the RM system is lost since the MTase activity degrades more  
54 quickly than REase activity, resulting in digestion of the host genome at unmodified recognition sites  
55 [9,10]. RM systems have been hypothesized to act as barriers to genetic exchange and drive  
56 population diversification [11,12]. In *Escherichia coli*, for example, conjugational uptake of plasmids is  
57 reduced by the RM system EcoKI when the plasmids contain EcoKI recognition sequences [13].  
58 However, transferred DNA that is digested by a cell's restriction endonuclease can still effectively  
59 recombine with the recipient's chromosomal DNA [7,14,15]; the effect of DNA digestion serves to  
60 limit homologous recombinant DNA fragment size [16]. Restriction thus advantages its host by  
61 decreasing transfer of large mobile genetic elements and infection with phage originating in  
62 organisms without the cognate MTase [8], while also reducing linkage between beneficial and slightly  
63 deleterious mutations [17].  
64

65 There are four major types of RM systems which have been classified in bacteria and archaea  
66 [18,19]. Type I RM systems consist of three types of subunits: REase (R) subunits, MTase (M) subunits,  
67 and site specificity (S) subunits which contain two tandem TRDs. These subunits form pentamer  
68 complexes of two R subunits, two M subunits, and one S subunit, and these complexes will either  
69 fully methylate recognition sites which are modified on only one DNA strand (hemimethylated) or  
70 cleave the DNA several bases upstream or downstream of recognition sites which are unmethylated  
71 on both strands [20,21]. The MTases and REases of Type II RM systems have their own TRDs and  
72 operate independently of each other, but each one targets the same recognition site [22]. There are  
73 many different subclasses of Type II RM system enzymes, such as Type IIG enzymes which contain  
74 both REase and MTase domains and are, therefore, capable of both methylation and endonuclease  
75 activity [23]. Type III RM systems consist of REase (Res) and MTase (Mod) subunits which work  
76 together as complexes, with the Mod subunit containing the TRD which recognizes asymmetric target  
77 sequences [24]. Type IV RM systems are made up of only REases, but unlike in other RM systems,  
78 these REases will target and cleave methylated recognition sites [20,25].  
79

80 MTases can also exist in bacterial and archaeal hosts as orphan MTases, in which they occur  
81 independently of cognate restriction enzymes and typically have important physiological functions  
82 [26]. In *E. coli*, the orphan MTase Dam, an adenine MTase which targets the recognition sequence  
83 GATC, is involved in regulating the timing of DNA replication by methylating the GATC sites  
84 present at the origin of replication (*oriC*) [27]. The protein SeqA binds to hemimethylated GATC sites  
85 at *oriC*, which prevents re-initiation of DNA replication at *oriC* after a new strand has been  
86 synthesized [28,29]. Dam methylation is also important in DNA repair in *E. coli*, where the  
87 methylation state of GATC sites is used by the methyl-directed mismatch repair (MMR) system to  
88 identify the original DNA strand in order to make repairs to the newly-synthesized strand [30–32].  
89 In *Cauldobacter crescentus*, the methylation of target sites in genes such as *ctrA* by orphan adenine  
90 MTase CcrM helps regulate the cell cycle of the organism [33–35]. The importance of orphan MTases  
91 in cellular processes is likely the reason why they are more widespread and conserved in bacteria  
92 compared to MTases associated with RM systems [36,37].  
93

94 MTases and RM systems have been well-studied in the bacteria, but less research has been  
95 performed in archaea, with most studies focused on characterizing RM systems of thermophilic  
96 species [38–42]. Recent research into the halophilic archaeal species *Haloferax volcanii* has  
97 demonstrated a role for DNA methylation in DNA metabolism, and probably uptake: cells could not  
98 grow on wild type *E. coli* DNA as a phosphorous source, whereas unmethylated *E. coli* was  
99 metabolized completely [43,44]. In an effort to better understand this phenomenon, we  
100 characterized the genomic methylation patterns (methylome) and MTases in the halophilic archaeal  
101 species *Haloferax volcanii* [45,46]. However, the distribution of RM systems and MTases among the  
102 archaea has not been extensively studied, and thus their life histories and impact on host evolution  
103 are unclear.

104  
105 To that end we surveyed the breadth of available genomes from public databases representing  
106 the class Halobacteria, also known as the Haloarchaea, for RM system and MTase candidate genes.  
107 We further sequenced additional genomes from the genus *Halorubrum* which provided an  
108 opportunity to examine patterns among very closely related strains. Upon examining their patterns  
109 of occurrence, we discovered orphan methyltransferases widely distributed throughout the  
110 Haloarchaea. In contrast, RM system candidate genes had a sparse and spotty distribution  
111 indicating frequent gene transfer and loss. Even individuals from the same species isolated from  
112 the same environment and at the same time, differed in the RM system complement.

## 113 2. Materials and Methods

114 **Search Approach.** The starting data consists of 217 Halobacteria genomes from NCBI and 14 in-  
115 house sequenced genomes (Supplementary Table S1). We note that some of these genomes were  
116 assembled from shotgun metagenome sequences and not from individual cultured strains. Genome  
117 completion was determined through identification of 371 Halobacteriaceae marker genes using  
118 CheckM v1.0.7 [47]. Queries for all restriction-methylation-specificity genes were obtained from the  
119 Restriction Enzyme dataBASE (REBASE) website [48,49]. As methylation genes are classified by  
120 function rather than by homology [48] the protein sequences of each category were clustered into  
121 homologous groups (HGs) via the *uclust* function of the USEARCH v9.0.2132 package [50] at a 40  
122 percent identity. The resulting ~36,000 HGs were aligned with MUSCLE v3.8.31 [51]. HMMs were  
123 then generated from the alignments using the *hmmbuild* function of HMMER3 v3.1b2 (hmmer.org).  
124 The ORFs of the 217 genomes were searched against the profiles via the *hmmsearch* function of  
125 HMMER3. Top hits were extracted and cross hits filtered with in-house Perl scripts. Steps were taken  
126 to collapse and filter HGs. First, the hits were searched against the arCOG database [52] using BLAST  
127 [53] to assign arCOG identifiers to the members of each group. Second the R package *igraph* v1.2.2  
128 [54] was used to create a list of connected components from the arCOG identifications. All members  
129 of a connected component were collapsed into a single collapsed HG (cHG).

130  
131 Because REBASE is a database of all methylation-restriction-related activities there are  
132 many members of the database outside our interest. At this point we made a manual curation of our  
133 cHGs attempting to identify known functions that did not apply to our area of interest. Examples  
134 include protein methylation enzymes, exonucleases, cell-division proteins, etc. The final tally of this  
135 clustering and filtering yielded 1696 hits across 48 total candidate cHGs. arCOG annotations indicate  
136 DNA methylase activity, restriction enzyme activity, or specificity module activity as part of an RM  
137 system for 26 cHGs. The remaining 22 cHGs had predominant arCOG annotations matching other  
138 functions that may reasonably be excluded from conservative RM system-specific analyses. For a  
139 graphical representation of the search strategy see supplementary materials **Figure S1**.

140  
141 **Reference Phylogeny.** A reference tree was created using the full complement of ribosomal  
142 proteins. The ribosomal protein set for *Halorubrum lacusprofundi* ATCC 49239 was obtained from the  
143 BioCyc website [55]. Each protein orf was used as the query in a BLAST [53] search against each  
144 genome. Hits for each gene were aligned with MUSCLE v3.8.31 [51] and then concatenated with in-

145 house scripting. The concatenated alignment was subjected to maximum likelihood phylogenetic  
146 inference in the IQ-TREE v1.6.1 suite with ultrafast bootstrapping and automated model selection  
147 [56,57]. The final model selection was LG+F+R9.

148  
149 **F81 Presence-Absence Phylogeny.** It is desirable to use maximum-likelihood methodology  
150 rather than simple distance measures. To realize this, the matrix was converted to an A/T alignment  
151 by replacing each present with an “A” and absent with a “T.” This allowed use of an F81 model with  
152 empirical base frequencies. This confines the base parameters to only A and T while allowing all of  
153 the other advantages of an ML approach. IQ-TREE was employed to infer the tree with 100 bootstraps  
154 [57].

155  
156 **Horizontal Gene Transfer Detection.** Gene trees for each of the cHGs were inferred using  
157 RAxML v8.2.11 [58] under PROTCATLG models with 100 bootstraps. The gene trees were then  
158 improved by resolving their poorly supported in nodes to match the species tree using TreeFix-DTL  
159 [59]. Optimized gene tree rootings were inferred with the OptRoot function of Ranger-DTL.  
160 Reconciliation costs for each gene tree were computed against the reference tree using Ranger-DTL  
161 2.0 (<http://compbio.engr.uconn.edu/software/RANGER-DTL/>) [60] with default DTL costs. One-  
162 hundred reconciliations, each using a different random seed, were calculated for each cHG. After  
163 aggregating these with the AggregateRanger function of Ranger-DTL the results were summarized  
164 and each prediction and any transfer inferred in 51% or greater of cases was counted as a transfer  
165 event.

166  
167 **Data Analysis and Presentation:** The presence-absence matrix of cHGs was plotted as a  
168 heatmap onto the reference phylogeny using the *heatmap* function of the R Bioconductor package  
169 *ggtree* v1.14.4 [61,62]. The rarefaction curve was generated with the *specaccum* function of the *vegan*  
170 v2.5-3 package in R [63] and number of genomes per homologous group was plotted with *ggplot2*  
171 v3.1.0 [64]. Spearman correlations and significances between the presence-absence of cHGs was  
172 calculated with the *rcorr* function of the *hmisc* v4.1-1 package in R  
173 (<http://biostat.mc.vanderbilt.edu/wiki/Main/Hmisc>). A significance cutoff of  $p < 0.05$  was used with  
174 a Bonferroni correction. All comparisons failing this criterion were set to correlation = 0. These data  
175 were plotted into a correlogram via the *corrplot* function of the R package *corrplot* v0.84. To compare  
176 the Phylogeny calculated from Presence-Absence data to the ribosomal protein reference, the  
177 bootstrap support set of the presence-absence phylogeny was mapped onto the ribosomal protein  
178 reference tree using the *plotBS* function in *phangorn* v2.4.0 [65]. Support values equal to or greater  
179 than 10% are displayed. To compare phylogenies using Internode Certainty, scores were  
180 calculated using the IC/TC score calculation algorithm implemented in RAxML v8.2.11 [58,66].

181  
182 **Synteny.** Genomes were searched for location of cHGs. Proximity was used to determine  
183 synteny of groups of cHGs frequently identified on the same genomes.

184  
185 **Presence-Absence PCoA.** Jaccard distances between presence-absence of taxa were calculated  
186 using the *distance* function of the R package *phylentropy* v0.2.0 [67]. The PCoA was generated using  
187 the *wcmdscale* function in *vegan* v2.5-3 [63]. The two best sampled genera, *Halorubrum* (orange) and  
188 *Haloferax* (red), are colored distinctively.

189  
190 **Recognition Site Assignment.** To determine the most likely recognition sites, each member of  
191 each cHG was searched against the REBASE Gold Standard set using BLASTp. The REBASE gold  
192 standard set was chosen over the individual gene sets on account of it having a much higher density  
193 of recognition site annotation. This simplifies the need to search for secondary hits to find predicted  
194 target sites. After applying an e-value cut-off of  $1E-20$ , the top hit was assigned to each ORF.

195

196 **CTAG and GATC** motifs were counted with an inhouse perl script available at the Gogarten-  
197 lab's GitHub [68].

198  
199 **Gene Ontology.** Sets of GO terms were identified for each cHG using Blast2GO [69].  
200 Annotations were checked against the UniProt database [70] using arCOG identifiers.

### 201 **3. Results**

#### 202 *RM-system gene distribution*

203 Analysis of 217 haloarchaeal genomes and metagenome assembled genomes yielded 48 total  
204 candidate collapsed homologous groups (cHGs) of RM-system components. Out of these 48 cHGs,  
205 26 had arCOG annotation suggesting DNA methylase activity, restriction enzyme activity, or  
206 specificity module activity as part of an RM system. We detected 22 weaker candidates with  
207 predominant arCOG annotations matching other functions (**Table 1**). Our analysis shows that nearly  
208 all of the cHGs are found more than once. (**Figure 1A**). Indeed, 16 families are found in 20 or more  
209 genomes each (>9 %), and this frequency steadily increases culminating in five families being  
210 conserved in greater than 80 genomes each (>37 %) with one cHG being in ~80 % of all Haloarchaea  
211 surveyed. Though these genes appear frequently in taxa across the haloarchaeal class, the majority of  
212 each candidate RM system cHG is present in fewer than half the genomes, - the second most  
213 abundantly recovered cHG is found in only ~47 % of all taxa surveyed. We note that the cHGs with  
214 wide distribution are annotated as MTases without an identifiable co-evolving restriction  
215 endonuclease: Group U DNA\_methylase-022; W dam\_methylase-031; Y dcm\_methylase-044; and AT  
216 Uncharacterized-032 (members of this cHG are also annotated as methylation subunit and N6-  
217 Adenine MTase). Rarefaction analysis indicates about 50 % of the genomes assayed contain seven  
218 dominant cHGs, and that all taxa on average are represented by half of the cHGs (**Figure 1B**).  
219 Together, the separate analyses indicate extensive gene gain and loss of RM-system genes. In  
220 contrast, orphan MTases in cHG U and W, and to a lesser extent Y (Figure 2) have a wider distribution  
221 in some genera (see below for further discussion).

222  
223 The phylogeny of the class Halobacteria inferred from concatenated ribosomal proteins (**Figure**  
224 **2**) was largely comparable to prior work [71], and with a taxonomy based on concatenations of  
225 conserved proteins [72,73]. For instance, in our phylogeny the *Halorubraceae* group with the  
226 *Haloferacaceae* recapitulating the order *Haloferacales*, and the families, *Halobacteriaceae*, *Haloarculaceae*  
227 and *Halococcaceae* group within the order *Halobacteriales*. Our genome survey in search of RM-  
228 system genes encompassed a broad taxonomic sampling, and it explores in depth the genus  
229 *Halorubrum* because it is a highly speciated genus, and because the existence of many genomes from  
230 the same species allows within species distribution assessment.

231  
232 Comparison of the phylogeny in **Figure 2** to the heatmap giving the presence/absence of RM  
233 system cHG candidates demonstrates that the cHG distribution is highly variable (**Figure 2**). The  
234 one glaring exception is cHG U, a DNA methylase found in 174 of the 217 genomes analyzed. Since  
235 it is not coupled with a restriction enzyme of equal abundance, it is assumed to be an orphan MTase.  
236 The MTase from *Hfx. volcanii* (gene HVO\_0794), which recognizes the CTAG motif [45] is a member  
237 of this cHG. Though U is widely distributed, within the genus *Halorubrum* it is only found in ~37.5 %  
238 (21/56) of the genomes. While U's phylogenetic profile is compatible with vertical inheritance over  
239 much of the phylogeny, the presence absence data also indicate a few gene transfer and loss events  
240 within *Halorubrum*. cHG U is present in *Hrr. tebenquichense* DSM14210, *Hrr. hochstenium*  
241 ATCC700873, *Hrr. sp.* AJ767, and in strains from the related species *Hrr. distributum*, *Hrr. arcis*, *Hrr.*  
242 *litoreum* and *Hrr. terrestre* suggesting an acquisition in the ancestor of this group.

243  
244 Instead of U, another orphan MTase is abundantly present in *Halorubrum* spp., cHG W. It was  
245 found in ~95 % of all *Halorubrum* strains, with three exceptions - an assembled genome from

246 metagenome sequence data, and two from incomplete draft genomes of the species *Halorubrum*  
247 *ezzemoulense*. Interestingly, when U is present in a *Halorubrum* sp. genome, so too is W (**Figure 2**).  
248 In a complementary fashion, analysis of W outside of the *Halorubrum* shows that it is found patchily  
249 distributed throughout the rest of the class Halobacteria (~20 % -32/158), and always as a second  
250 orphan MTase with cHG U. When the members of cHG W were used to search the uniprot database,  
251 the significant matches included the *E. coli* Dam MTase, a very well-characterized GATC MTase,  
252 which provides strong evidence that this cHG is a GATC orphan MTase family. The presence and  
253 absence of cHG U and W in completely sequenced genomes is given in Table S3, together with the  
254 frequency of the CTAG and GATC motifs in the main chromosome.  
255

256 The rest of the RM cHGs are much more patchily distributed (**Figure 2**). For instance, the cHGs  
257 that make up columns A-G represent different gene families within the Type I RM system  
258 classification; two MTases (A,B), three REases (C,D,E), and two site specificity units (SSUs) (F,G).  
259 Throughout the Haloarchaea, cHGs from columns A, E and F, representing an MTase, an REase, and  
260 an SSU respectively, are found co-occurring 35 times. In a subset of genomes studied for synteny  
261 A, E and F are encoded next to one another in *Natrinema gari*, *Halorhabdus utahensis*, *Halorubrum*  
262 *SD690R*, *Halorubrum ezzemoulense* G37, and *Haloorientalis* IM1011 (**Figure 3**). These genes probably  
263 represent a single transcriptional unit of genes working together for restriction and modification  
264 purposes. Since the Type I RM system is a five-component system, the likely stoichiometry is 2:2:1.  
265 These three cHGs co-occur four times within the species *Halorubrum ezzemoulense*, and two of these  
266 cHGs (A and E) co-occur an additional three more times, suggesting either a loss of the SSU, or an  
267 incomplete genome sequence for those strains. If it is due to incomplete sequencing, then 7/16 (43  
268 %) of the *Hrr. ezzemoulense* genomes have this set of co-occurring genes, while half do not have an  
269 identified Type I system. This is particularly stunning since strains FB21, Ec15, G37 and Ga2p were  
270 all cultivated at the same time from the same sample, a hypersaline lake in Iran. Furthermore, one  
271 strain, Ga36, has a different identified Type I RM system composed of substituted cHGs A and E with  
272 B and D, respectively, while maintaining the same SSU. This suggests the same DNA motif may be  
273 recognized by the different cHGs and that these cHGs are therefore functionally interchangeable.  
274 Members of cHGs B, F, and D were found as likely co-transcribed units in *Halococcus salifodinae*,  
275 *Natronolimnobius aegyptiacus*, *Halorubrum kocurii*, *Haloarcula amylyolytica* (**Figure 3**). In *Halorubrum*  
276 *DL*, and *Halovivax ruber* XH70, genomes that contained members from cHGs A, B, D, E, and F these  
277 genes were not found in a single unit, suggesting that they do not form a single RM system.  
278 Together, these analyses suggest this Type I RM system has a wide but sporadic distribution, that  
279 this RM system is not required for individual survival, and that functional substitutions occur for  
280 cHGs.  
281

282 Type II RM systems contain an MTase and an REase that target the same motif but do not require  
283 an associated SSU because each enzyme has its own TRD. The Type II RM system cHGs are in  
284 columns H-L for the MTases, and M-P for the REases. Memberships to the Type II MTase cHGs are  
285 far more numerous in the Haloarchaea than their REase counterpart, as might be expected when  
286 witnessing decaying RM systems through the loss of the REase. The opposite result, more REases is  
287 a more difficult scenario because an unmethylated host genome would be subject to restriction by the  
288 remaining cognate REase (e.g., addiction cassettes). There are 14 “orphan” Type II REases in **Figure**  
289 **2**, but their cognate MTase’s absence could be explained by incomplete genome sequence data.  
290

291 Type III RM systems have been identified in cHGs Q (MTase) and R and S (REases). Type III  
292 MTases and REases (cHGs Q and R) co-occur almost exclusively in the species *Halorubrum*  
293 *ezzemoulense*, our most highly represented taxon. Furthermore, these Type III RM systems are highly  
294 restricted in their distribution to that species, with cHGs co-occurring only twice more throughout the  
295 Haloarchaea, and with a different REase cHG (S); once in *Halorubrum arcis*, and another in  
296 *Halobacterium* D1. Orphan MTases occurred twice in cHG Q. Of particular interest is that closely  
297 related strains also cultivated from Lake Bidgol in Iran but which are in a different but closely related

298 *Halorubrum* species (e.g., Ea8, IB24, Hd13, Ea1, Eb13) do not have a Type III RM system, implying  
299 though exposed to the same halophilic viruses, they do not rely on this system for avoiding virus  
300 infection.

301  
302 cHGs Z-AV are not sufficiently characterized to pinpoint of their role in DNA RM systems or as  
303 MTase. These cHGs likely include homing endonuclease or enzymes modifying nucleotide in RNA  
304 molecules; however, their function as orphan MTases or restriction endonucleases can at present not  
305 be excluded.

306

### 307 *Horizontal Gene Transfer explains patchy distribution*

308 The patchy appearance of RM system candidates was further investigated by plotting the  
309 Jaccard distance of the presence-absence data against the alignment distance of the reference tree  
310 (supplementary **Figure S2**). If the presence-absence data followed vertical descent one would expect  
311 the best-fit line to move from the origin with a strong positive slope. Instead, the best fit line is close  
312 to horizontal with an r-squared value of 0.0047, indicating negligible relationship between the overall  
313 genome phylogeny and RM system complement per genome. As another way of visualizing this data,  
314 the presence-absence patterns were plotted as a principle coordinates analysis (supplementary  
315 **Figure S3**). The high degree of overlap between the ranges of the three groups illustrates that there  
316 are few RM system genes unique to a given group and a large amount of overlap in repertoires.

317

318 To further evaluate the the lack of long term vertical descent for RM system genes, a phylogeny  
319 was inferred from the presence-absence pattern of cHGs. The resultant tree (**Figure S4**) is largely in  
320 disagreement with the reference phylogeny. The bootstrap support set from the presence-absence  
321 phylogeny was mapped onto the ribosomal topology (**Figure S5**). The resulting support values  
322 demonstrate an extremely small degree of agreement between the two methods. The few areas where  
323 there is even 10% support are near the tips of the ribosomal phylogeny and correspond to parts of  
324 established groups, such as *Haloferax*, *Natronobacterium*, and *Halorubrum*. Internode Certainty (IC)  
325 scores are another way to compare phylogenies. An average IC score of 1 represents complete  
326 agreement between the two phylogenies, and score of -1 complete disagreement. The average IC  
327 scores for the reference tree using the support set from the F81 tree was -0.509, illustrating that the  
328 presence absence data do not support the topology of the reference phylogeny.

329

330 The patchy distribution of the RM system candidate genes and their lack of conformity to the  
331 reference phylogeny suggests frequent horizontal gene transfer combined with gene loss events as  
332 the most probable explanation for the observed data. To quantify the amount of transfer the TreeFix-  
333 Ranger pipeline was employed. TreeFix-DTL resolves poorly supported areas of gene trees to better  
334 match the concatenated ribosomal protein gene tree used as reference. Ranger-DTL resolves optimal  
335 gene tree rooting against the species tree and then computes a reconciliation estimating the number  
336 of duplications, transfers, and losses that best explains the data (**Table 2**). For almost every cHG with  
337 four or more taxa our analysis infers several HGT events. Only cHG R, a putative Type III restriction  
338 enzyme found only in a group of closely related *Halorubrum ezzemoulense* strains, has not been inferred  
339 to undergo at least one transfer event.

340

341 RM systems usually function as cooperative units [48,74,75]. It stands to reason that some of the  
342 RM system candidates may be transferred as units, maintaining their cognate functionality. This  
343 possibility was examined by a correlation analysis. A spearman correlation was made between all  
344 pairs of cHGs. Those with a significant result at a Bonferroni-corrected  $p < 0.05$  were plotted in a  
345 correlogram (**Figure 4**). As illustrated in **Figure 3**, cHGs with significant similar phylogenetic profiles  
346 often are near to one another in the genomes.

347

348 3.2. Figures and Tables

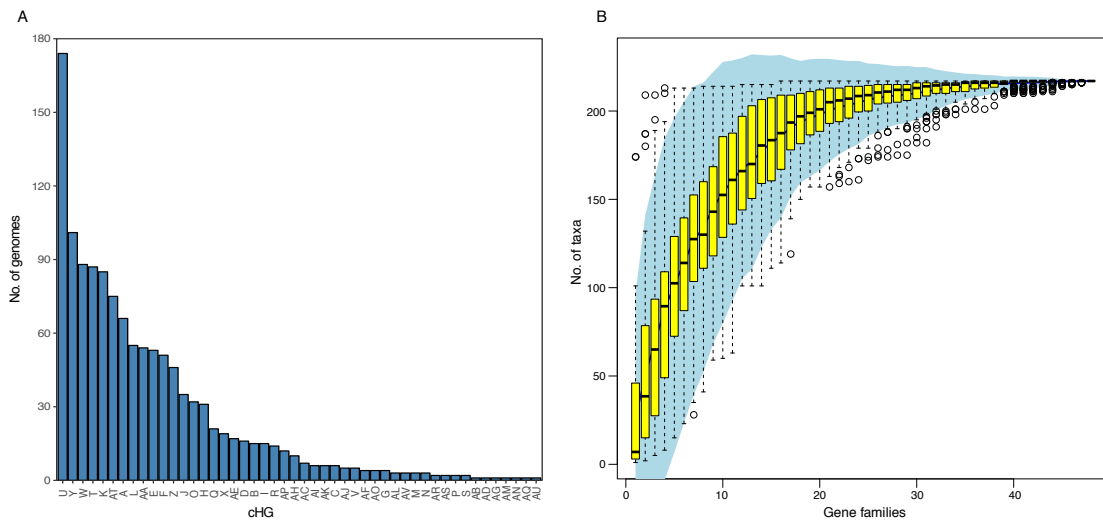

349

350

351

352

353

354

355

356

**Figure 1:** Distribution of collapsed Homologous Group (cHG) among haloarchaeal genomes. (A) the number of genomes present in each collapsed Homologous Group (cHG). No cHG contains a representative from every genome used in this study. With the exception of one cHG, all contain members from fewer than half of the genomes. The cHGs are ordered by number of genomes they contain. (B) rarefaction plot of the number of genomes represented as cHGs accumulate. 95% confidence interval is shown in shaded blue area and yellow box whisker plots give the number of taxa from random subsamples (permutations = 100) over 48 gene families.

357



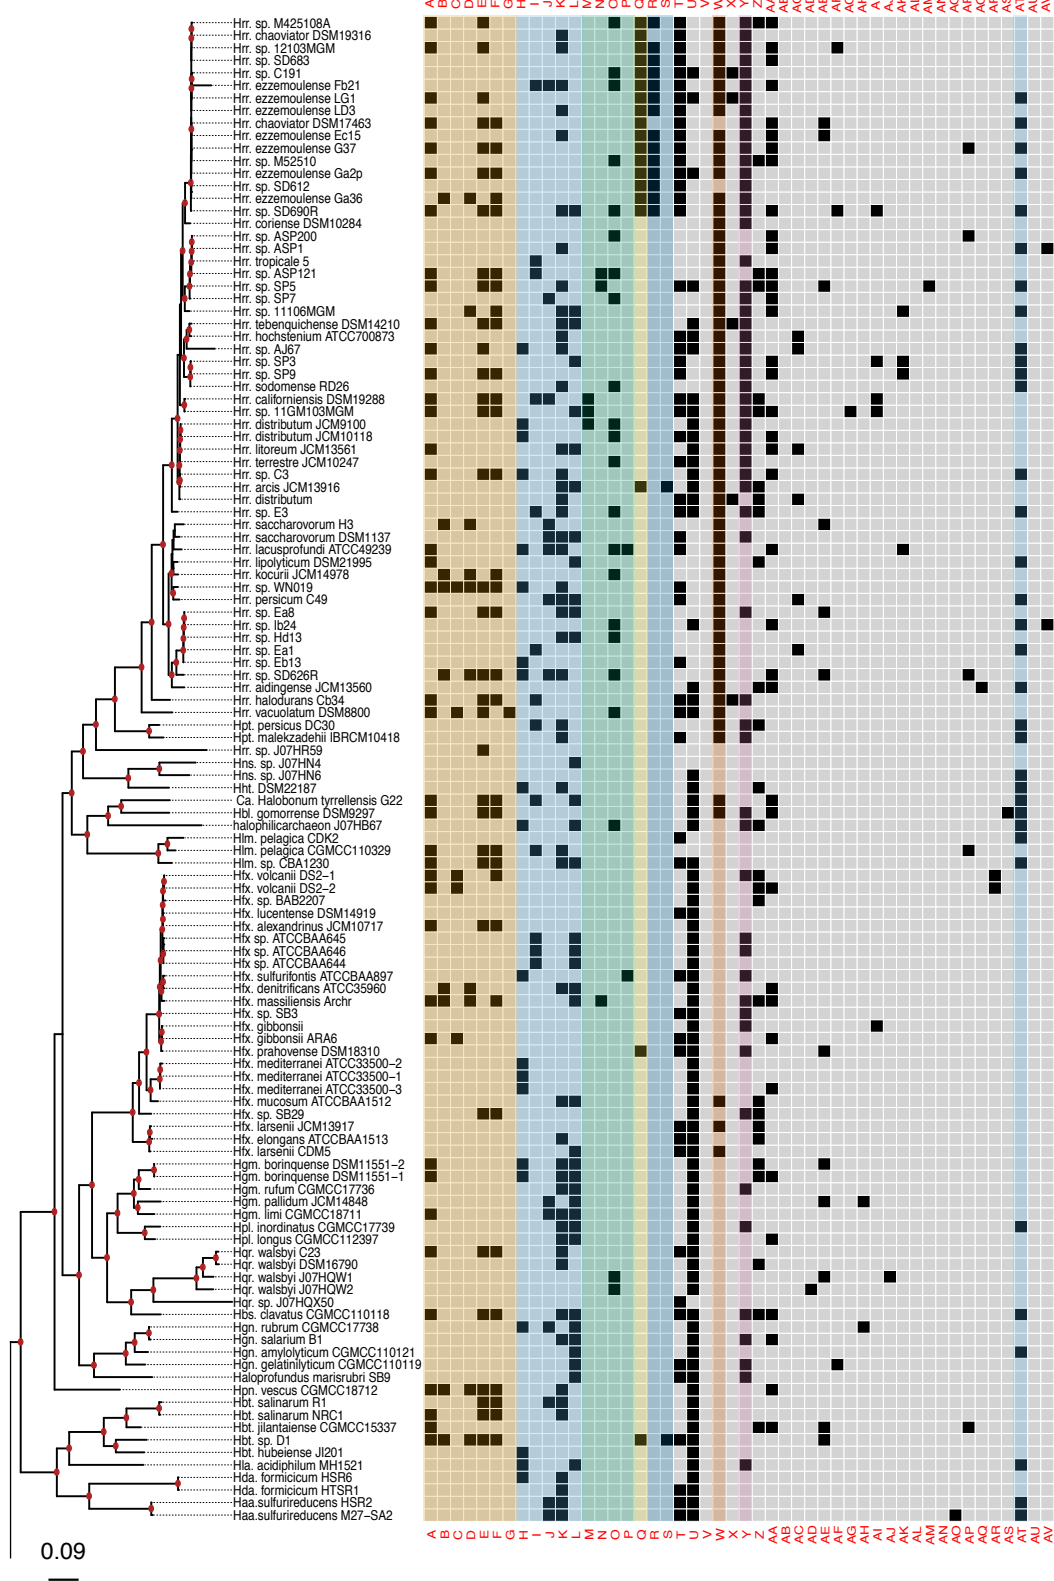

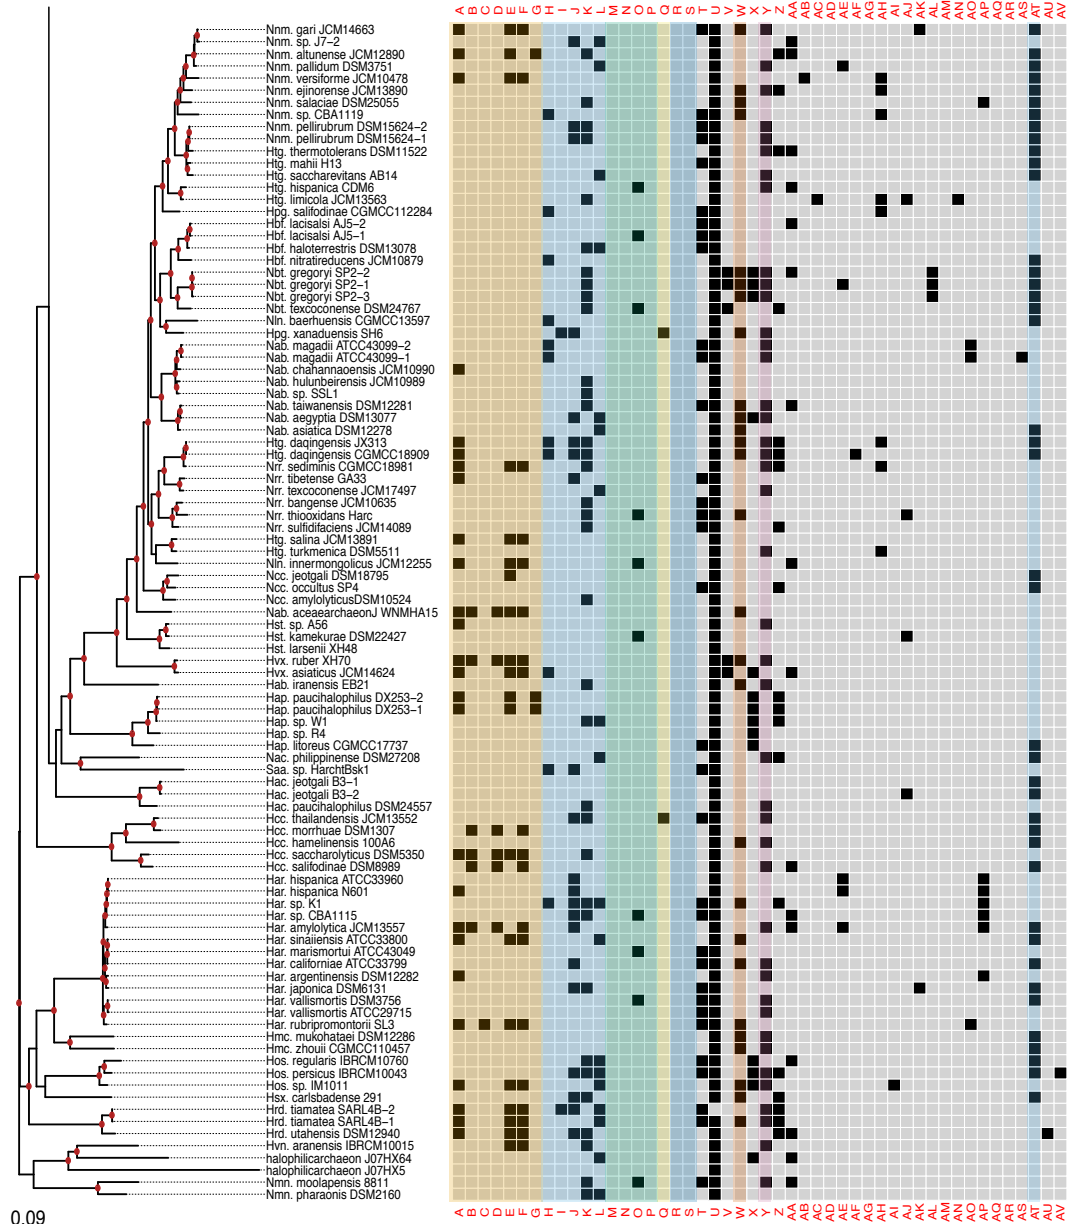

359

360

361

362

363

364

**Figure 2:** Presence-absence matrix of the 48 candidate RMS CHGs plotted against the reference phylogeny. For most CHGs the pattern of presence-absence does not match the reference phylogeny (compare supplementary Figures S2-S5) RMS-candidate CHGs are loosely ordered by system type and with the ambiguously assigned RM candidates at the end. Above is a key relating the column names to the majority functional annotation.

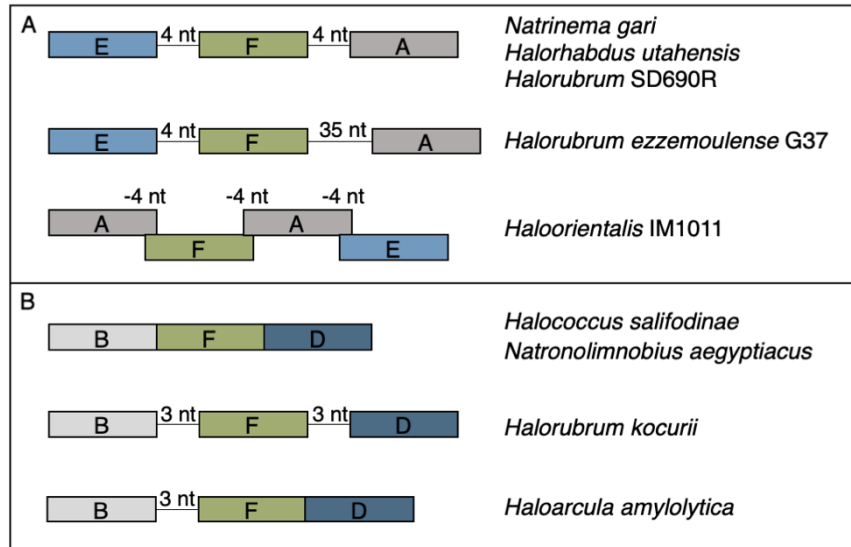

365  
366  
367  
368  
369

**Figure 3.** Gene maps for syntenic clusters of gene families (A) EFA and (B) BFD found in a subset of organisms identified to the right of each map. Genes are colored by gene families with Type I methylases (AB) in greys, Type I restriction endonucleases (DE) in blues, and Type I site specificity unit (F) in green.

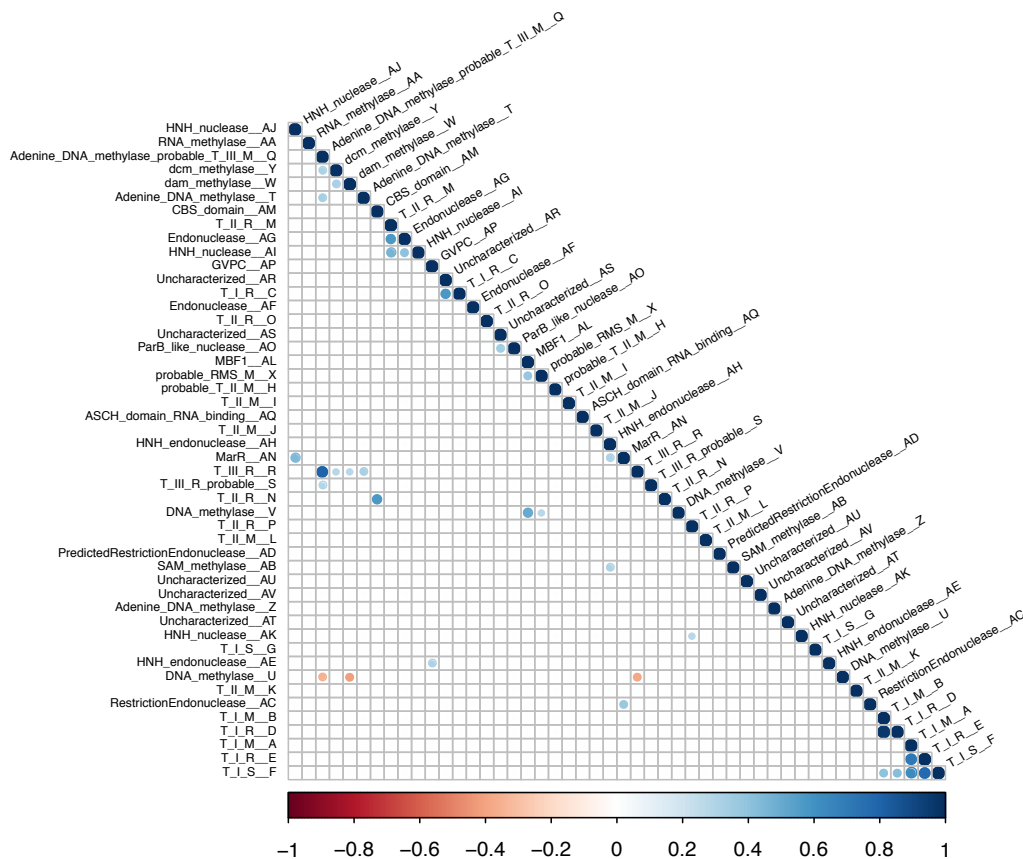

370

371

372

373

374

375

**Figure 4.** Heatmap of co-occurrence between the 48 RMS-candidate CHGs. Positive correlation indicates the CHGs co-occur while negative indicates that the presence of one means the other will not be present. Significance level is  $p < 0.05$  with a Bonferroni correction applied for multiple tests. Blue indicates significant positive correlation; red indicates a significant negative correlation.

**Table 1.** Collapsed homologous group descriptions. §

| Alpha code | Numerical code | Annotated arCOG Function <sup>§§</sup> | arCOG number |
|------------|----------------|----------------------------------------|--------------|
| A          | cHG_021        | T I M                                  | arCOG02632   |
| B          | cHG_024        | T I M                                  | arCOG05282   |
| C          | cHG_018        | T_I_R                                  | arCOG00880   |
| D          | cHG_034        | T I R                                  | arCOG00879   |
| E          | cHG_045        | T I R                                  | arCOG00878   |
| F          | cHG_006        | T I S                                  | arCOG02626   |
| G          | cHG_025        | T I S                                  | arCOG02628   |
| H          | cHG_036        | probable T II M                        | arCOG00890   |
| I          | cHG_001        | T II M                                 | arCOG02635   |
| J          | cHG_003        | T II M                                 | arCOG02634   |
| K          | cHG_011        | T II M                                 | arCOG04814   |
| L          | cHG_033        | T II M                                 | arCOG03521   |
| M          | cHG_007        | T_II_R                                 | arCOG11279   |
| N          | cHG_013        | T II R                                 | arCOG11717   |
| O          | cHG_023        | T II R                                 | arCOG03779   |
| P          | cHG_029        | T_II_R                                 | arCOG08993   |
| Q          | cHG_042        | Adenine DNA methylase probable T III M | arCOG00108   |
| R          | cHG_008        | T III R                                | arCOG06887   |
| S          | cHG_009        | T III R probable                       | arCOG07494   |
| T          | cHG_014        | Adenine DNA methylase                  | arCOG00889   |
| U          | cHG_022        | DNA methylase                          | arCOG00115   |
| V          | cHG_027        | DNA methylase                          | arCOG00129   |
| W          | cHG_031        | dam methylase                          | arCOG03416   |
| X          | cHG_035        | probable RMS M                         | arCOG08990   |
| Y          | cHG_044        | dcm methylase                          | arCOG04157   |
| Z          | cHG_048        | Adenine DNA methylase                  | arCOG02636   |
| AA         | cHG_010        | RNA methylase                          | arCOG00910   |
| AB         | cHG_040        | SAM-methylase                          | arCOG01792   |
| AC         | cHG_012        | RestrictionEndonuclease                | arCOG05724   |
| AD         | cHG_038        | PredictedRestrictionEndonuclease       | arCOG06431   |
| AE         | cHG_015        | HNH endonuclease                       | arCOG07787   |
| AF         | cHG_019        | Endonuclease                           | arCOG02782   |
| AG         | cHG_020        | Endonuclease                           | arCOG02781   |
| AH         | cHG_004        | HNH endonuclease                       | arCOG09398   |
| AI         | cHG_037        | HNH_nuclease                           | arCOG05223   |
| AJ         | cHG_039        | HNH nuclease                           | arCOG03898   |
| AK         | cHG_041        | HNH nuclease                           | arCOG08099   |
| AL         | cHG_046        | MBF1                                   | arCOG01863   |
| AM         | cHG_028        | CBS domain                             | arCOG00608   |
| AN         | cHG_005        | MarR                                   | arCOG03182   |
| AO         | cHG_030        | ParB-like nuclease                     | arCOG01875   |
| AP         | cHG_016        | GVPC                                   | arCOG06392   |
| AQ         | cHG_002        | ASCH domain RNA binding                | arCOG01734   |
| AR         | cHG_017        | Uncharacterized                        | arCOG10082   |
| AS         | cHG_026        | Uncharacterized                        | arCOG13171   |
| AT         | cHG_032        | Uncharacterized                        | arCOG08946   |
| AU         | cHG_043        | Uncharacterized                        | arCOG08856   |
| AV         | cHG_047        | Uncharacterized                        | arCOG04588   |

376 §: A listing of associated Gene Ontology terms and gene family descriptions is available in  
 377 supplementary Table S2

378 §§: T\_I and T\_II denote type I and type II restriction enzyme, respectively. M, R, S denote  
 379 the methylase, restriction endonuclease, and specificity subunits, respectively.

380

**Table 2.** Important traits of cHGs with four or more ORFs.

| Alpha (numeric) cHG | No. of taxa | No. of transfers <sup>a</sup> | Function <sup>b</sup>    | Predicted Recognition sites <sup>c</sup> | Frequency <sup>e</sup> |
|---------------------|-------------|-------------------------------|--------------------------|------------------------------------------|------------------------|
| I (001)             | 16          | 9                             | T_II_M                   | GAAGGC                                   | 31%                    |
|                     |             |                               |                          | GGRCA                                    | 31%                    |
| J (003)             | 38          | 21                            | T_II_M                   | CANCATC                                  | 53%                    |
|                     |             |                               |                          | TAGGAG                                   | 21%                    |
| AH (004)            | 12          | 4                             | HNH_endonuclease         | GGCGCC                                   | 89%                    |
|                     |             |                               |                          | GATC                                     | 11%                    |
| F (006)             | 61          | 44                            | T_I_S                    | GGAYNNNNNNTGG                            | 24%                    |
|                     |             |                               |                          | CAGNNNNNNTGCT                            | 16%                    |
| R (008)             | 14          | 0                             | T_III_R                  | NA <sup>d</sup>                          | 100%                   |
| AA (010)            | 55          | 15                            | RNA_methylase            | ATTAAT                                   | 33%                    |
| K (011)             | 137         | 97                            | T_II_M                   | GCAAGG                                   | 49%                    |
|                     |             |                               |                          | GKAAYG                                   | 28%                    |
| AC (012)            | 8           | 5                             | Restriction Endonuclease | GCGAA                                    | 29%                    |
|                     |             |                               |                          | CAACNNNNNTC                              | 29%                    |
|                     |             |                               |                          | CTGGAG                                   | 29%                    |
| T (014)             | 130         | 93                            | Adenine_DNA_methylase    | GCAGG                                    | 45%                    |
|                     |             |                               |                          | AAGCTT                                   | 32%                    |
| AE (015)            | 21          | 13                            | HNH_endonuclease         | GGCGCC                                   | 70%                    |
|                     |             |                               |                          | YSCNS                                    | 15%                    |
| AP (016)            | 12          | 6                             | GVPC                     | CANCATC                                  | 83%                    |
| C (018)             | 7           | 4                             | T_I_R                    | AACNNNNNNGTGC                            | 73%                    |
|                     |             |                               |                          | CTANNNNNNRTTC                            | 27%                    |
| AF (019)            | 4           | 3                             | Endonuclease             | NA <sup>d</sup>                          | 100%                   |
| A (021)             | 88          | 58                            | T_I_M                    | GGAYNNNNNNTGG                            | 37%                    |
|                     |             |                               |                          | GTCANNNNNNRTCA                           | 12%                    |
|                     |             |                               |                          | CTCGAG                                   | 9%                     |
| U (022)             | 290         | 120                           | DNA_methylase            | CTAG                                     | 59%                    |
|                     |             |                               |                          | CATTC                                    | 14%                    |
|                     |             |                               |                          | CCCGGG                                   | 7%                     |
| O (023)             | 37          | 28                            | T_II_R                   | NA <sup>d</sup>                          | 100%                   |
| B (024)             | 16          | 8                             | T_I_M                    | GAGNNNNNNVTGAC                           | 75%                    |
|                     |             |                               |                          | GACNNNNNNRTAC                            | 19%                    |
| G (025)             | 4           | 2                             | T_I_S                    | GAGNNNNRTAA                              | 75%                    |
|                     |             |                               |                          | GAGNNNNNTAC                              | 25%                    |
| V (027)             | 5           | 1                             | DNA_methylase            | CATTC                                    | 100%                   |
| AO (030)            | 4           | 2                             | ParB-like_nuclease       | GATC                                     | 75%                    |
|                     |             |                               |                          | CTAG                                     | 25%                    |
| W (031)             | 153         | 70                            | dam_methylase            | GATC                                     | 70%                    |
|                     |             |                               |                          | AB / SAAM                                | 22%                    |

|          |     |     |                       |                 |      |
|----------|-----|-----|-----------------------|-----------------|------|
| AT (032) | 116 | 60  | Uncharacterized       | GCAAGG          | 43%  |
|          |     |     |                       | GKAAYG          | 26%  |
|          |     |     |                       | GGTTAG          | 14%  |
| L (033)  | 66  | 38  | T_II_M-033            | CAARCA          | 40%  |
|          |     |     |                       | CTGAAG          | 36%  |
| D (034)  | 16  | 11  | T_I_R-034             | GCANNNNNRRTTA   | 69%  |
|          |     |     |                       | GGCANNNNNNTTC   | 19%  |
| X (035)  | 19  | 9   | probable_RMS_M        | GGGAC           | 83%  |
| H (036)  | 38  | 24  | probable_T_II_M       | CCWGG           | 42%  |
|          |     |     |                       | CCSGG           | 18%  |
|          |     |     |                       | GTAC            | 16%  |
| AI (037) | 6   | 4   | HNH_nuclease          | NA <sup>d</sup> | 100% |
| AJ (039) | 5   | 4   | HNH_nuclease          | GGCGCC          | 100% |
| AK (041) | 6   | 4   | HNH_nuclease          | NA <sup>d</sup> | 100% |
| Q (042)  | 21  | 8   | Adenine_DNA_methylase | RGTAAT          | 71%  |
|          |     |     | probable_T_III_M      | NA <sup>d</sup> | 19%  |
| Y (044)  | 179 | 110 | dcm_methylase         | CGGCCG          | 24%  |
|          |     |     |                       | GTCGAC          | 13%  |
|          |     |     |                       | ACGT            | 11%  |
| E (045)  | 58  | 42  | T_I_R                 | CCNNNNNRRTTGY   | 63%  |
|          |     |     |                       | GCANNNNNRRTTA   | 28%  |
| Z (048)  | 54  | 35  | Adenine_DNA_methylase | CCRGAG          | 36%  |
|          |     |     |                       | GTMKAC          | 30%  |

<sup>a</sup> Number of estimated horizontal gene transfer events

<sup>b</sup> T\_I and T\_II denote type I and type II restriction enzyme, respectively. M, R, S denote the methylase, restriction endonuclease, and specificity subunits, respectively.

<sup>c</sup> Top predicted recognition sites

<sup>d</sup> No predicted recognition site

<sup>e</sup> Frequency of predictions within the cHG

381

382

#### 383 4. Discussion

384 A striking result of our study is the irregular distribution of the RM system gene candidates  
385 throughout not just the haloarchaeal class, but also within its orders, genera, species, and even  
386 communities and populations. The patchy distribution is almost certainly the result of frequent HGT  
387 and gene loss. RM system genes are well known for their susceptibility to HGT and loss, and their  
388 presence almost never define a clade or an environmental source (e.g., [36,76]). Frequent acquisition  
389 of RM system genes through HGT is illustrated by their sporadic distribution. For example,  
390 *Halorubrum* genomes encode many candidate RM system cHGs that are absent from the remainder  
391 of the Halobacteria (e.g., cHG M, R, S, AC, AG, AM). Only one of these (cHG R) is found in more than  
392 3 genomes, a Type III restriction protein found in 14 of 57 *Halorubrum* genomes. Gene loss  
393 undoubtedly contributed to the sparse cHGs distribution; however, without invoking frequent gene  
394 transfer, many independent and parallel gene losses need to be postulated. We also observed that a  
395 number haloarchaeal species possess multiple Type I subunit genes, allowing for functional  
396 substitution of the different subunits in the RM system. The existence of multiple Type I subunits has  
397 also been observed in *Helicobacter pylori*, in which 4 different SSU loci are used by the organism's  
398 Type I system to target different recognition sequences; these SSUs can even exchange TRDs,  
399 resulting in variation in the methylome of *H. pylori* [77–79]. In our results, however, we observed  
400 multiple MTase and REase subunits alongside a single SSU, suggesting the functional substitution of  
401 the subunits in these haloarchaeal organisms does not result in variation in detected recognition  
402 sequences.

403  
404 It seems counterintuitive that RM systems are not more conserved as cellular countermeasures  
405 against commonly occurring viruses. It may be that cells do not require extensive protection via  
406 RM systems, because they use multiple defensive systems some of which might be more effective.  
407 For example, another well-known defense against viruses is the CRISPR-Cas system [80]. CRISPR  
408 recognizes short (~40bp) regions of invading DNA that the host has been exposed to previously and  
409 degrades it. While it can be very useful against virus infection, our prior work indicated that CRISPR-  
410 Cas was also sporadically distributed within communities of closely related haloarchaeal species [81]  
411 indicating they are not required for surviving virus infection.

412  
413 Both the RM and CRISPR-Cas systems are only important countermeasures after external  
414 fortifications have failed to prevent a virus from infiltrating, and therefore their limited distributions  
415 also indicate that the cell's primary defense would be in preventing virus infection altogether, which  
416 is accomplished by different mechanisms. By altering surfaces via glycosylation cells can avoid virus  
417 predation prior to infection. In *Haloferax* species there are two pathways which control glycosylation  
418 of external features. One is relatively conserved and could have functions other than virus avoidance,  
419 while the other is highly variable and shows hallmarks of having genes mobilized by horizontal  
420 transfer [82]. At least one halovirus has been found to require glycosylation by its host in order to  
421 infect properly [83]. Comparison of genomes and metagenomes from hypersaline environments  
422 showed widespread evidence for distinct "genomic" islands in closely related halophiles [84] that  
423 contain a unique mixture of LPS and other genes that contribute to altering the cell's surface structure  
424 and virus docking opportunities. Thus selective pressure on post infection, cytosolic and nucleic  
425 acids-based virus defenses is eased, allowing them to be lost randomly in populations.

426  
427 A major consideration in understanding RM system diversity is that viruses, or other infiltrating  
428 selfish genetic elements, might gain access to the host's methylation after a successful infection that  
429 was not stopped by the restriction system. Indeed, haloviruses are known to encode DNA  
430 methyltransferases in their genomes (e.g., see [85]). In this case, RM systems having a limited within  
431 population distribution would then be an effective defense for that part of the population possessing  
432 a different RM system. Under this scenario, a large and diverse pool of mobilized RM system genes  
433 could offer a stronger defense for the population as a whole. A single successful infection would no  
434 longer endanger the entire group of potential hosts.

435

436

437

438

439

440

441

442

443

444

445

446

447

448

449

450

451

452

453

454

455

456

457

458

459

460

461

462

463

464

465

466

467

468

469

470

471

472

473

Group selection may be invoked to explain the within population diversity of RM systems; a sparse distribution of RM systems may provide a potential benefit to the population as a whole, because a virus cannot easily infect all members of the population. However, often gene level selection is a more appropriate alternative to group selection [86,87]. Under a gene centered explanation, RM systems are considered as selfish addiction cassettes that may be of little benefit to its carrier. While RM systems may be difficult to delete as a whole, stepwise deletion, that begins with inactivation of the REase activity can lead to their loss from a lineage. Their long-term survival thus may be a balance of gain through gene transfer, persistence through addiction, and gene loss. This gene centered explanation is supported by a study from [36], which examined the distribution of MTase genes in ~1000 bacterial genomes. They observed, similar to our results in the Halobacteria, that MTases associated with RM systems are poorly conserved, whereas orphan MTases share conservation patterns similar to average genes. They also demonstrated that many RM-associated and orphan MTases are horizontally acquired, and that a number of orphan MTases in bacterial genomes neighbor degraded REase genes, suggesting that they are the product of degraded RM systems that have lost functional REases [36]. Similarly, Kong et al. [76] studying genome content variation in *Neisseria meningitidis* found an irregular distribution of RM systems, suggesting that these systems do not form an effective barrier to homologous recombination within the species. Kong et al. also observed that the RM systems themselves had been frequently transferred within the species. We conclude that RM genes in bacteria as well as archaea appear to undergo significant horizontal transfer and are not well-conserved. Only when these genes pick up additional functions, do parts of these systems persist for longer periods of time, as exemplified in the distribution of orphan MTases. However, the transition from RM system MTase to orphan MTase is an infrequent event. A study of 43 pan-genomes by Oliveira et al. [88] suggests that orphan MTases occur more frequently from transfer via large mobile genetic elements (MGEs) such as plasmids and phages rather than arise *de novo* from RM degradation. The distribution of orphan methylase CHG U and W, and their likely target motifs, CTAG and GATC, respectively suggests different biological functions for these two methylases. Similar to other bacterial and archaeal genomes [89], the CTAG motif, the likely target for methylases in CHG U, is underrepresented in all haloarchaeal genomes (see table S3). The low frequency of occurrence, only about once per 4000 nucleotides, suggests that this motif and the cognate orphan methylase are not significantly involved in facilitating mismatch repair. The underrepresented CTAG motif was found to be less underrepresented near rRNA genes [89] and on plasmids; the CTAG motif also is a known target sequence for some IS elements [90]; and it may be involved in repressor binding, where the CTAG motif was found to be associated with kinks in the DNA when bound to the repressor [91,92]. Interestingly, CTAG and GATC motifs are absent, or underrepresented in several haloarchaeal viruses [85,93,94]. However, at present the reasons for the underrepresentation of the motif in chromosomal DNA, and the role that the methylation of this motif may play remain open questions.

474

## 5. Conclusions

475

476

477

478

479

480

RM systems have a sporadic distribution in haloarchaea, even within species and populations. In contrast, orphan methylases are more persistent in lineages, and the targeted motifs are under selection for lower (in case of CTAG) or higher (in case of GATC) than expected frequency. In case of the GATC motif, the cognate orphan MTase was found only in genomes where this motif occurs with high frequency.



481 **Supplementary Materials:** The following are available online at [www.mdpi.com/xxx/s1](http://www.mdpi.com/xxx/s1),  
482 **Figure S1.** Workflow of RMS-candidate gene search strategy.  
483 **Figure S2.** Plot of alignment distance as a function of presence-absence distance.  
484 **Figure S3.** PCoA plot of the distances between the RMS presence-absence profiles of the 217 analyzed  
485 Halobacterial genomes.  
486 **Figure S4.** Maximum-likelihood phylogeny of cHG presence-absence matrix.  
487 **Figure S5.** Bootstrap support values of the presence-absence phylogeny mapped onto the ribosomal  
488 protein reference tree.  
489 **Table S1.** Basic statistics for Halobacteriaceae complete and draft genomes  
490 **Table S2.** Gene Ontology (GO) terms for each collapsed homologous group  
491 **Table S3.** Distribution of orphan methylases cHGs U and W and frequency of their putative recognition  
492 motifs in completely sequenced halobacterial chromosomes.  
493 **Author Contributions:** Conceptualization, Thane R. Papke and Johann Peter Gogarten; Data curation, Matthew  
494 S. Fullmer, Matthew Ouellette and Artemis S. Louyakis; Formal analysis, Matthew S. Fullmer, Matthew  
495 Ouellette and Artemis S. Louyakis; Funding acquisition, Thane R. Papke and Johann Peter Gogarten;  
496 Investigation, Matthew S. Fullmer and Matthew Ouellette; Methodology, Matthew S. Fullmer, Artemis S.  
497 Louyakis and Johann Peter Gogarten; Project administration, Thane R. Papke and Johann Peter Gogarten;  
498 Software, Matthew S. Fullmer and Artemis S. Louyakis; Supervision, Thane R. Papke and Johann Peter Gogarten;  
499 Validation, Matthew S. Fullmer; Visualization, Matthew S. Fullmer and Artemis S. Louyakis; Writing – original  
500 draft, Matthew S. Fullmer and Johann Peter Gogarten; Writing – review & editing, Matthew Ouellette, Artemis  
501 S. Louyakis, Thane R. Papke and Johann Peter Gogarten.  
502 **Funding:** This work was supported through grants from the Binational Science Foundation (BSF 2013061); the  
503 National Science Foundation (NSF/MCB 1716046) within the BSF-NSF joint research program; and NASA  
504 exobiology (NNX15AM09G, and 80NSSC18K1533).  
505 **Acknowledgments:** The Computational Biology Core, Institute for Systems Genomics, University of  
506 Connecticut provided computational resources.  
507  
508 **Conflicts of Interest:** The authors declare no conflict of interest.  
509

510

511 **References**

- 512 1. Korlach, J.; Turner, S. W. Going beyond five bases in DNA sequencing. *Curr. Opin. Struct. Biol.* **2012**, *22*, 251–  
513 261, doi:10.1016/j.sbi.2012.04.002.
- 514 2. Bheemanaik, S.; Reddy, Y. V. R.; Rao, D. N. Structure, function and mechanism of exocyclic DNA  
515 methyltransferases. *Biochem. J.* **2006**, *399*, 177–190, doi:10.1042/BJ20060854.
- 516 3. Malone, T.; Blumenthal, R. M.; Cheng, X. Structure-guided analysis reveals nine sequence motifs conserved  
517 among DNA amino-methyl-transferases, and suggests a catalytic mechanism for these enzymes. *J. Mol. Biol.*  
518 **1995**, *253*, 618–632, doi:10.1006/jmbi.1995.0577.
- 519 4. Bujnicki, J. M.; Radlinska, M. Molecular evolution of DNA-(cytosine-N4) methyltransferases: evidence for  
520 their polyphyletic origin. *Nucleic Acids Res.* **1999**, *27*, 4501–9.
- 521 5. Bujnicki, J. M. Sequence permutations in the molecular evolution of DNA methyltransferases. *BMC Evol.*  
522 *Biol.* **2002**, *2*, 3.
- 523 6. Tock, M. R.; Dryden, D. T. The biology of restriction and anti-restriction. *Curr. Opin. Microbiol.* **2005**, *8*, 466–  
524 472, doi:10.1016/j.mib.2005.06.003.
- 525 7. Vasu, K.; Nagaraja, V. Diverse functions of restriction-modification systems in addition to cellular defense.  
526 *Microbiol. Mol. Biol. Rev.* **2013**, *77*, 53–72, doi:10.1128/MMBR.00044-12.
- 527 8. Pleška, M.; Qian, L.; Okura, R.; Bergmiller, T.; Wakamoto, Y.; Kussell, E.; Guet, C. C. Bacterial autoimmunity  
528 due to a restriction-modification system. *Curr. Biol. CB* **2016**, *26*, 404–409, doi:10.1016/j.cub.2015.12.041.
- 529 9. Ohno, S.; Handa, N.; Watanabe-Matsui, M.; Takahashi, N.; Kobayashi, I. Maintenance forced by a  
530 restriction-modification system can be modulated by a region in its modification enzyme not essential for  
531 methyltransferase activity. *J. Bacteriol.* **2008**, *190*, 2039–2049, doi:10.1128/JB.01319-07.
- 532 10. Kobayashi, I. Behavior of restriction-modification systems as selfish mobile elements and their impact on  
533 genome evolution. *Nucleic Acids Res.* **2001**, *29*, 3742–56.
- 534 11. Budroni, S.; Siena, E.; Hotopp, J. C. D.; Seib, K. L.; Serruto, D.; Nofroni, C.; Comanducci, M.; Riley, D. R.;  
535 Daugherty, S. C.; Angiuoli, S. V.; Covacci, A.; Pizza, M.; Rappuoli, R.; Moxon, E. R.; Tettelin, H.; Medini, D.  
536 *Neisseria meningitidis* is structured in clades associated with restriction modification systems that modulate  
537 homologous recombination. *Proc. Natl. Acad. Sci.* **2011**, *108*, 4494–4499, doi:10.1073/pnas.1019751108.
- 538 12. Erwin, A. L.; Sandstedt, S. A.; Bonthuis, P. J.; Geelhood, J. L.; Nelson, K. L.; Unrath, W. C. T.; Diggle, M. A.;  
539 Theodore, M. J.; Pleatman, C. R.; Mothershed, E. A.; Sacchi, C. T.; Mayer, L. W.; Gilsdorf, J. R.; Smith, A. L.  
540 Analysis of Genetic Relatedness of *Haemophilus influenzae* Isolates by Multilocus Sequence Typing. *J.*  
541 *Bacteriol.* **2008**, *190*, 1473–1483, doi:10.1128/JB.01207-07.
- 542 13. Roer, L.; Aarestrup, F. M.; Hasman, H. The EcoKI type I restriction-modification system in *Escherichia coli*  
543 affects but is not an absolute barrier for conjugation. *J. Bacteriol.* **2015**, *197*, 337–342, doi:10.1128/JB.02418-14.
- 544 14. McKane, M.; Milkman, R. Transduction, restriction and recombination patterns in *Escherichia coli*. *Genetics*  
545 **1995**, *139*, 35–43.
- 546 15. Chang, S.; Cohen, S. N. In vivo site-specific genetic recombination promoted by the EcoRI restriction  
547 endonuclease. *Proc. Natl. Acad. Sci. U. S. A.* **1977**, *74*, 4811–5.
- 548 16. Lin, E. A.; Zhang, X.-S.; Levine, S. M.; Gill, S. R.; Falush, D.; Blaser, M. J. Natural transformation of  
549 *Helicobacter pylori* involves the integration of short dna fragments interrupted by gaps of variable size. *PLoS*  
550 *Pathog.* **2009**, *5*, e1000337, doi:10.1371/journal.ppat.1000337.
- 551 17. Muller, H. J. The relation of recombination to mutational advance. *Mutat. Res.* **1964**, *1*, 2–9.
- 552 18. Ershova, A. S.; Rusinov, I. S.; Spirin, S. A.; Karyagina, A. S.; Alexeevski, A. V. Role of restriction-modification  
553 systems in prokaryotic evolution and ecology. *Biochem.* **2015**, *80*, 1373–1386, doi:10.1134/S0006297915100193.
- 554 19. Roberts, R. J.; Belfort, M.; Bestor, T.; Bhagwat, A. S.; Bickle, T. A.; Bitinaite, J.; Blumenthal, R. M.; Degtyarev,  
555 S. K.; Dryden, D. T. F.; Dybvig, K.; Firman, K.; Gromova, E. S.; Gumpert, R. I.; Halford, S. E.; Hattman, S.;  
556 Heitman, J.; Hornby, D. P.; Janulaitis, A.; Jeltsch, A.; Josephsen, J.; Kiss, A.; Klaenhammer, T. R.; Kobayashi,  
557 I.; Kong, H.; Krüger, D. H.; Lacks, S.; Marinus, M. G.; Miyahara, M.; Morgan, R. D.; Murray, N. E.; Nagaraja,  
558 V.; Piekarowicz, A.; Pingoud, A.; Raleigh, E.; Rao, D. N.; Reich, N.; Repin, V. E.; Selker, E. U.; Shaw, P.-C.;  
559 Stein, D. C.; Stoddard, B. L.; Szybalski, W.; Trautner, T. A.; Van Etten, J. L.; Vitor, J. M. B.; Wilson, G. G.; Xu,  
560 S. A nomenclature for restriction enzymes, DNA methyltransferases, homing endonucleases and their  
561 genes. *Nucleic Acids Res.* **2003**, *31*, 1805–12.

- 562 20. Loenen, W. A. M.; Dryden, D. T. F.; Raleigh, E. A.; Wilson, G. G. Type I restriction enzymes and their  
563 relatives. *Nucleic Acids Res.* **2014**, *42*, 20–44, doi:10.1093/nar/gkt847.
- 564 21. Liu, Y.-P.; Tang, Q.; Zhang, J.-Z.; Tian, L.-F.; Gao, P.; Yan, X.-X. Structural basis underlying complex  
565 assembly and conformational transition of the type I R-M system. *Proc. Natl. Acad. Sci.* **2017**, *114*, 11151–  
566 11156, doi:10.1073/pnas.1711754114.
- 567 22. Pingoud, A.; Wilson, G. G.; Wende, W. Type II restriction endonucleases—a historical perspective and more.  
568 *Nucleic Acids Res.* **2014**, *42*, 7489–7527, doi:10.1093/nar/gku447.
- 569 23. Morgan, R. D.; Bhatia, T. K.; Lovasco, L.; Davis, T. B. MmeI: a minimal Type II restriction-modification  
570 system that only modifies one DNA strand for host protection. *Nucleic Acids Res.* **2008**, *36*, 6558–6570,  
571 doi:10.1093/nar/gkn711.
- 572 24. Rao, D. N.; Dryden, D. T. F.; Bheemanaik, S. Type III restriction-modification enzymes: a historical  
573 perspective. *Nucleic Acids Res.* **2014**, *42*, 45–55, doi:10.1093/nar/gkt616.
- 574 25. Czapsinska, H.; Kowalska, M.; Zagorskaitė, E.; Manakova, E.; Slyvka, A.; Xu, S.; Siksnyš, V.; Sasnauskas, G.;  
575 Bochtler, M. Activity and structure of EcoKMcrA. *Nucleic Acids Res.* **2018**, *46*, 9829–9841,  
576 doi:10.1093/nar/gky731.
- 577 26. Adhikari, S.; Curtis, P. D. DNA methyltransferases and epigenetic regulation in bacteria. *FEMS Microbiol.*  
578 *Rev.* **2016**, *40*, 575–591, doi:10.1093/femsre/fuw023.
- 579 27. Messer, W.; Bellekes, U.; Lother, H. Effect of dam methylation on the activity of the E. coli replication origin,  
580 oriC. *EMBO J.* **1985**, *4*, 1327–32.
- 581 28. Kang, S.; Lee, H.; Han, J. S.; Hwang, D. S. Interaction of SeqA and Dam methylase on the hemimethylated  
582 origin of Escherichia coli chromosomal DNA replication. *J. Biol. Chem.* **1999**, *274*, 11463–8.
- 583 29. Sanchez-Romero, M. A.; Busby, S. J. W.; Dyer, N. P.; Ott, S.; Millard, A. D.; Grainger, D. C. Dynamic  
584 distribution of SeqA protein across the chromosome of Escherichia coli K-12. *MBio* **2010**, *1*,  
585 doi:10.1128/mBio.00012-10.
- 586 30. Welsh, K. M.; Lu, A. L.; Clark, S.; Modrich, P. Isolation and characterization of the Escherichia coli mutH  
587 gene product. *J. Biol. Chem.* **1987**, *262*, 15624–9.
- 588 31. Au, K. G.; Welsh, K.; Modrich, P. Initiation of methyl-directed mismatch repair. *J. Biol. Chem.* **1992**, *267*,  
589 12142–8.
- 590 32. Putnam, C. D. Evolution of the methyl directed mismatch repair system in Escherichia coli. *DNA Repair*  
591 *(Amst)*. **2016**, *38*, 32–41, doi:10.1016/j.dnarep.2015.11.016.
- 592 33. Zweiger, G.; Marczyński, G.; Shapiro, L. A Caulobacter DNA Methyltransferase that functions only in the  
593 predivisional cell. *J. Mol. Biol.* **1994**, *235*, 472–485, doi:10.1006/jmbi.1994.1007.
- 594 34. Domian, I. J.; Reisenauer, A.; Shapiro, L. Feedback control of a master bacterial cell-cycle regulator. *Proc.*  
595 *Natl. Acad. Sci. U. S. A.* **1999**, *96*, 6648–53.
- 596 35. Gonzalez, D.; Kozdon, J. B.; McAdams, H. H.; Shapiro, L.; Collier, J. The functions of DNA methylation by  
597 CcrM in Caulobacter crescentus: a global approach. *Nucleic Acids Res.* **2014**, *42*, 3720–3735,  
598 doi:10.1093/nar/gkt1352.
- 599 36. Seshasayee, A. S. N.; Singh, P.; Krishna, S. Context-dependent conservation of DNA methyltransferases in  
600 bacteria. *Nucleic Acids Res.* **2012**, *40*, 7066–7073, doi:10.1093/nar/gks390.
- 601 37. Blow, M. J.; Clark, T. A.; Daum, C. G.; Deutschbauer, A. M.; Fomenkov, A.; Fries, R.; Froula, J.; Kang, D. D.;  
602 Malmstrom, R. R.; Morgan, R. D.; Posfai, J.; Singh, K.; Visel, A.; Wetmore, K.; Zhao, Z.; Rubin, E. M.; Korch,  
603 J.; Pennacchio, L. A.; Roberts, R. J. The epigenomic landscape of prokaryotes. *PLOS Genet.* **2016**, *12*, e1005854,  
604 doi:10.1371/journal.pgen.1005854.
- 605 38. Nölling, J.; de Vos, W. M. Identification of the CTAG-recognizing restriction-modification systems MthZI  
606 and MthFI from Methanobacterium thermoformicum and characterization of the plasmid-encoded  
607 mthZIM gene. *Nucleic Acids Res.* **1992**, *20*, 5047–52.
- 608 39. Grogan, D. W. Cytosine methylation by the SuaI restriction-modification system: implications for genetic  
609 fidelity in a hyperthermophilic archaeon. *J. Bacteriol.* **2003**, *185*, 4657–61.
- 610 40. Ishikawa, K.; Watanabe, M.; Kuroita, T.; Uchiyama, I.; Bujnicki, J. M.; Kawakami, B.; Tanokura, M.;  
611 Kobayashi, I. Discovery of a novel restriction endonuclease by genome comparison and application of a  
612 wheat-germ-based cell-free translation assay: PabI (5'-GTA/C) from the hyperthermophilic archaeon  
613 Pyrococcus abyssi. *Nucleic Acids Res.* **2005**, *33*, e112–e112, doi:10.1093/nar/gni113.

- 614 41. Watanabe, M.; Yuzawa, H.; Handa, N.; Kobayashi, I. Hyperthermophilic DNA methyltransferase M.PabI  
615 from the archaeon *Pyrococcus abyssi*. *Appl. Environ. Microbiol.* **2006**, *72*, 5367–5375, doi:10.1128/AEM.00433-  
616 06.
- 617 42. Couturier, M.; Lindås, A.-C. The DNA methylome of the hyperthermoacidophilic crenarchaeon *Sulfolobus*  
618 *acidocaldarius*. *Front. Microbiol.* **2018**, *9*, 137, doi:10.3389/fmicb.2018.00137.
- 619 43. Chimileski, S.; Dolas, K.; Naor, A.; Gophna, U.; Papke, R. T. Extracellular DNA metabolism in *Haloferax*  
620 *volcanii*. *Front. Microbiol.* **2014**, *5*, 57, doi:10.3389/fmicb.2014.00057.
- 621 44. Zerulla, K.; Chimileski, S.; Näther, D.; Gophna, U.; Papke, R. T.; Soppa, J. DNA as a Phosphate storage  
622 polymer and the alternative advantages of polyploidy for growth or survival. *PLoS One* **2014**, *9*, e94819,  
623 doi:10.1371/journal.pone.0094819.
- 624 45. Ouellette, M.; Gogarten, J.; Lajoie, J.; Makkay, A.; Papke, R. Characterizing the DNA methyltransferases of  
625 *Haloferax volcanii* via bioinformatics, gene deletion, and SMRT sequencing. *Genes (Basel)*. **2018**, *9*, 129,  
626 doi:10.3390/genes9030129.
- 627 46. Ouellette, M.; Jackson, L.; Chimileski, S.; Papke, R. T. Genome-wide DNA methylation analysis of *Haloferax*  
628 *volcanii* H26 and identification of DNA methyltransferase related PD-(D/E)XK nuclease family protein  
629 HVO\_A0006. *Front. Microbiol.* **2015**, *6*, 251, doi:10.3389/fmicb.2015.00251.
- 630 47. Parks, D. H.; Imelfort, M.; Skennerton, C. T.; Hugenholtz, P.; Tyson, G. W. CheckM: assessing the quality of  
631 microbial genomes recovered from isolates, single cells, and metagenomes. *Genome Res.* **2015**, gr-186072.
- 632 48. Roberts, R. J.; Macelis, D. REBASE—restriction enzymes and methylases. *Nucleic Acids Res.* **2001**, *29*, 268–  
633 269, doi:10.1093/nar/29.1.268.
- 634 49. Roberts, R. J.; Vincze, T.; Posfai, J.; Macelis, D. REBASE—a database for DNA restriction and modification:  
635 enzymes, genes and genomes. *Nucleic Acids Res.* **2015**, *43*, D298–D299, doi:10.1093/nar/gku1046.
- 636 50. Edgar, R. C. Search and clustering orders of magnitude faster than BLAST. *Bioinformatics* **2010**, *26*, 2460–  
637 2461, doi:10.1093/bioinformatics/btq461.
- 638 51. Edgar, R. C. MUSCLE: multiple sequence alignment with high accuracy and high throughput. *Nucl. Acids*  
639 *Res.* **2004**, *32*, 1792–1797.
- 640 52. Makarova, K. S.; Wolf, Y. I.; Koonin, E. V. Archaeal clusters of orthologous genes (ARCOGS): an update and  
641 application for analysis of shared features between Thermococcales, Methanococcales, and  
642 Methanobacteriales. *Life (Basel, Switzerland)* **2015**, *5*, 818–840, doi:10.3390/life5010818.
- 643 53. Altschul, S. F.; Madden, T. L.; Schäffer, A. A.; Zhang, J.; Zhang, Z.; Miller, W.; Lipman, D. J. Gapped BLAST  
644 and PSI-BLAST: a new generation of protein database search programs. *Nucleic Acids Res.* **1997**, *25*, 3389–  
645 3402, doi:10.1093/nar/25.17.3389.
- 646 54. Csardi, G.; Nepusz, T. The igraph software package for complex network research. *InterJournal* **2006**,  
647 *Complex Sy*, 1695.
- 648 55. Caspi, R.; Altman, T.; Dale, J. M.; Dreher, K.; Fulcher, C. A.; Gilham, F.; Kaipa, P.; Karthikeyan, A. S.; Kothari,  
649 A.; Krummenacker, M.; Latendresse, M.; Mueller, L. A.; Paley, S.; Popescu, L.; Pujar, A.; Shearer, A. G.;  
650 Zhang, P.; Karp, P. D. The MetaCyc database of metabolic pathways and enzymes and the BioCyc collection  
651 of pathway/genome databases. *Nucleic Acids Res.* **2010**, *38*, D473–D479, doi:10.1093/nar/gkp875.
- 652 56. Hoang, D. T.; Chernomor, O.; von Haeseler, A.; Minh, B. Q.; Le, S. V. UFBoot2: Improving the Ultrafast  
653 Bootstrap Approximation. *Mol. Biol. Evol.*, doi:10.1093/molbev/msx281.
- 654 57. Nguyen, L.-T.; Schmidt, H. A.; von Haeseler, A.; Minh, B. Q. IQ-TREE: A fast and effective stochastic  
655 algorithm for estimating maximum-likelihood phylogenies. *Mol. Biol. Evol.* **2015**, *32*, 268–274,  
656 doi:10.1093/molbev/msu300.
- 657 58. Stamatakis, A. RAxML version 8: a tool for phylogenetic analysis and post-analysis of large phylogenies.  
658 *Bioinformatics* **2014**, *30*, 1312–1313, doi:10.1093/bioinformatics/btu033.
- 659 59. Bansal, M. S.; Wu, Y.-C.; Alm, E. J.; Kellis, M. Improved gene tree error correction in the presence of  
660 horizontal gene transfer. *Bioinformatics* **2015**, *31*, 1211–1218, doi:10.1093/bioinformatics/btu806.
- 661 60. Bansal, M. S.; Alm, E. J.; Kellis, M. Efficient algorithms for the reconciliation problem with gene duplication,  
662 horizontal transfer and loss. *Bioinformatics* **2012**, *28*, i283–i291, doi:10.1093/bioinformatics/bts225.
- 663 61. Yu, G.; Smith, D. K.; Zhu, H.; Guan, Y.; Lam, T. T.-Y. ggtree: an r package for visualization and annotation  
664 of phylogenetic trees with their covariates and other associated data. *Methods Ecol. Evol.* **2017**, *8*, 28–36,  
665 doi:10.1111/2041-210X.12628.

- 666 62. Yu, G.; Lam, T. T.-Y.; Zhu, H.; Guan, Y. Two methods for mapping and visualizing associated data on  
667 phylogeny using ggtree. *Mol. Biol. Evol.* **2018**, *35*, 3041–3043, doi:10.1093/molbev/msy194.
- 668 63. Dixon, P. VEGAN, a package of R functions for community ecology. *J. Veg. Sci.* **2003**, *14*, 927–930,  
669 doi:10.1111/j.1654-1103.2003.tb02228.x.
- 670 64. Wickham, H. *ggplot2: elegant graphics for data analysis*; Springer, 2016; ISBN 3319242776.
- 671 65. Schliep, K. P. phangorn: phylogenetic analysis in R. *Bioinformatics* **2011**, *27*, 592–3,  
672 doi:10.1093/bioinformatics/btq706.
- 673 66. Salichos, L.; Rokas, A. Inferring ancient divergences requires genes with strong phylogenetic signals. *Nature*  
674 **2013**, *497*, 327–331, doi:10.1038/nature12130.
- 675 67. Drost, H. Philentropy: Information Theory and Distance Quantification with R. *J. Open Source Softw.* **2018**,  
676 *3*.
- 677 68. Gogarten, J. P. Perl script to measure frequency and distribution of CTAG and GATC motifs in DNA  
678 Available online: <https://github.com/Gogarten-Lab/CTAG-GATC-frequencies> (accessed on Jan 12, 2019).
- 679 69. Conesa, A.; Götz, S.; García-Gómez, J. M.; Terol, J.; Talón, M.; Robles, M. Blast2GO: a universal tool for  
680 annotation, visualization and analysis in functional genomics research. *Bioinformatics* **2005**, *21*, 3674–3676.
- 681 70. Consortium, U. UniProt: the universal protein knowledgebase. *Nucleic Acids Res.* **2016**, *45*, D158–D169.
- 682 71. Soucy, S. M.; Fullmer, M. S.; Papke, R. T.; Gogarten, J. P. Inteins as indicators of gene flow in the halobacteria.  
683 *Front. Microbiol.* **2014**, *5*, 299, doi:10.3389/fmicb.2014.00299.
- 684 72. Gupta, R. S.; Naushad, S.; Fabros, R.; Adeolu, M. A phylogenomic reappraisal of family-level divisions  
685 within the class Halobacteria: proposal to divide the order Halobacteriales into the families  
686 Halobacteriaceae, Haloarculaceae fam. nov., and Halococcaceae fam. nov., and the order Haloferacales into  
687 th. *Antonie Van Leeuwenhoek* **2016**, *109*, 565–587, doi:10.1007/s10482-016-0660-2.
- 688 73. Gupta, R. S.; Naushad, S.; Baker, S. Phylogenomic analyses and molecular signatures for the class  
689 Halobacteria and its two major clades: a proposal for division of the class Halobacteria into an emended  
690 order Halobacteriales and two new orders, Haloferacales ord. nov. and Natrhalobales ord. n. *Int. J. Syst. Evol.*  
691 *Microbiol.* **2015**, *65*, 1050–69, doi:10.1099/ijs.0.070136-0.
- 692 74. Ohno, S.; Handa, N.; Watanabe-Matsui, M.; Takahashi, N.; Kobayashi, I. Maintenance forced by a  
693 restriction-modification system can be modulated by a region in its modification enzyme not essential for  
694 methyltransferase activity. *J. Bacteriol.* **2008**, *190*, 2039–2049, doi:10.1128/JB.01319-07.
- 695 75. Roberts, R. J.; Belfort, M.; Bestor, T.; Bhagwat, A. S.; Bickle, T. A.; Bitinaite, J.; Blumenthal, R. M.; Degtyarev,  
696 S. K.; Dryden, D. T. F.; Dybvig, K.; Firman, K.; Gromova, E. S.; Gumpert, R. I.; Halford, S. E.; Hattman, S.;  
697 Heitman, J.; Hornby, D. P.; Janulaitis, A.; Jeltsch, A.; Josephsen, J.; Kiss, A.; Klaenhammer, T. R.; Kobayashi,  
698 I.; Kong, H.; Krüger, D. H.; Lacks, S.; Marinus, M. G.; Miyahara, M.; Morgan, R. D.; Murray, N. E.; Nagaraja,  
699 V.; Piekarowicz, A.; Pingoud, A.; Raleigh, E.; Rao, D. N.; Reich, N.; Repin, V. E.; Selker, E. U.; Shaw, P.-C.;  
700 Stein, D. C.; Stoddard, B. L.; Szybalski, W.; Trautner, T. A.; Etten, V.; L, J.; Vitor, J. M. B.; Wilson, G. G.; Xu,  
701 S. A nomenclature for restriction enzymes, DNA methyltransferases, homing endonucleases and their  
702 genes. *Nucleic Acids Res.* **2003**, *31*, 1805–1812, doi:10.1093/nar/gkg274.
- 703 76. Kong, Y.; Ma, J. H.; Warren, K.; Tsang, R. S. W.; Low, D. E.; Jamieson, F. B.; Alexander, D. C.; Hao, W.  
704 Homologous recombination drives both sequence diversity and gene content variation in *Neisseria*  
705 *meningitidis*. *Genome Biol. Evol.* **2013**, *5*, 1611–27, doi:10.1093/gbe/evt116.
- 706 77. Furuta, Y.; Namba-Fukuyo, H.; Shibata, T. F.; Nishiyama, T.; Shigenobu, S.; Suzuki, Y.; Sugano, S.; Hasebe,  
707 M.; Kobayashi, I. Methylome Diversification through Changes in DNA Methyltransferase Sequence  
708 Specificity. *PLoS Genet.* **2014**, *10*, e1004272, doi:10.1371/journal.pgen.1004272.
- 709 78. Furuta, Y.; Kobayashi, I. Mobility of DNA sequence recognition domains in DNA methyltransferases  
710 suggests epigenetics-driven adaptive evolution. *Mob. Genet. Elements* **2012**, *2*, 292–296,  
711 doi:10.4161/mge.23371.
- 712 79. Furuta, Y.; Kawai, M.; Uchiyama, I.; Kobayashi, I. Domain movement within a gene: a novel evolutionary  
713 mechanism for protein diversification. *PLoS One* **2011**, *6*, e18819, doi:10.1371/journal.pone.0018819.
- 714 80. Gophna, U.; Brodt, A. CRISPR/Cas systems in archaea. *Mob. Genet. Elements* **2012**, *2*, 63–64,  
715 doi:10.4161/mge.19907.
- 716 81. Fullmer, M. S.; Soucy, S. M.; Swithers, K. S.; Makkay, A. M.; Wheeler, R.; Ventosa, A.; Gogarten, J. P.; Papke,  
717 R. T. Population and genomic analysis of the genus *Haloarcula*. *Front. Microbiol.* **2014**, *5*, 140,  
718 doi:10.3389/fmicb.2014.00140.

- 719 82. Shalev, Y.; Soucy, S.; Papke, R.; Gogarten, J.; Eichler, J.; Gophna, U. Comparative analysis of surface layer  
720 glycoproteins and genes involved in protein glycosylation in the genus *Haloferax*. *Genes (Basel)*. **2018**, *9*, 172,  
721 doi:10.3390/genes9030172.
- 722 83. Kandiba, L.; Aitio, O.; Helin, J.; Guan, Z.; Permi, P.; Bamford, D. H.; Eichler, J.; Roine, E. Diversity in  
723 prokaryotic glycosylation: an archaeal-derived N-linked glycan contains legionaminic acid. *Mol. Microbiol.*  
724 **2012**, *84*, 578–593, doi:10.1111/j.1365-2958.2012.08045.x.
- 725 84. Rodriguez-Valera, F.; Martin-Cuadrado, A.-B.; Rodriguez-Brito, B.; Pašić, L.; Thingstad, T. F.; Rohwer, F.;  
726 Mira, A. Explaining microbial population genomics through phage predation. *Nat. Rev. Microbiol.* **2009**, *7*,  
727 828–836, doi:10.1038/nrmicro2235.
- 728 85. Tang, S.-L.; Nuttall, S.; Ngui, K.; Fisher, C.; Lopez, P.; Dyall-Smith, M. HF2: a double-stranded DNA tailed  
729 haloarchaeal virus with a mosaic genome. *Mol. Microbiol.* **2002**, *44*, 283–96.
- 730 86. Olendzenski, L.; Gogarten, J. P. Evolution of genes and organisms: the tree/web of life in light of horizontal  
731 gene transfer. *Ann N Y Acad Sci* **2009**, *1178*, 137–145, doi:NYAS4998 [pii]10.1111/j.1749-6632.2009.04998.x.
- 732 87. Naor, A.; Altman-Price, N.; Soucy, S. M.; Green, A. G.; Mitiagin, Y.; Turgeman-Grott, I.; Davidovich, N.;  
733 Gogarten, J. P.; Gophna, U. Impact of a homing intein on recombination frequency and organismal fitness.  
734 *Proc. Natl. Acad. Sci. U. S. A.* **2016**, *113*, E4654–61, doi:10.1073/pnas.1606416113.
- 735 88. Oliveira, P. H.; Touchon, M.; Rocha, E. P. C. The interplay of restriction-modification systems with mobile  
736 genetic elements and their prokaryotic hosts. *Nucleic Acids Res.* **2014**, *42*, 10618–31, doi:10.1093/nar/gku734.
- 737 89. Karlin, S.; Mrázek, J.; Campbell, A. M. Compositional biases of bacterial genomes and evolutionary  
738 implications. *J. Bacteriol.* **1997**, *179*, 3899–913.
- 739 90. Fournier, P.; Paulus, F.; Otten, L. IS870 requires a 5'-CTAG-3' target sequence to generate the stop codon for  
740 its large ORF1. *J. Bacteriol.* **1993**, *175*, 3151–60.
- 741 91. Otwinowski, Z.; Schevitz, R. W.; Zhang, R.-G.; Lawson, C. L.; Joachimiak, A.; Marmorstein, R. Q.; Luisi, B.  
742 F.; Sigler, P. B. Crystal structure of trp repressor/operator complex at atomic resolution. *Nature* **1988**, *335*,  
743 321–329, doi:10.1038/335321a0.
- 744 92. Burge, C.; Campbell, A. M.; Karlin, S. Over- and under-representation of short oligonucleotides in DNA  
745 sequences. *Proc. Natl. Acad. Sci. U. S. A.* **1992**, *89*, 1358–62.
- 746 93. Bath, C.; Cukalac, T.; Porter, K.; Dyall-Smith, M. L. His1 and His2 are distantly related, spindle-shaped  
747 haloviruses belonging to the novel virus group, Salterprovirus. *Virology* **2006**, *350*, 228–39,  
748 doi:10.1016/j.virol.2006.02.005.
- 749 94. Porter, K.; Tang, S.-L.; Chen, C.-P.; Chiang, P.-W.; Hong, M.-J.; Dyall-Smith, M. PH1: an archaeovirus of  
750 *Haloarcula hispanica* related to SH1 and HHIV-2. *Archaea* **2013**, *2013*, 456318, doi:10.1155/2013/456318.
- 751  
752

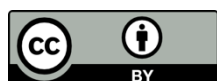

© 2019 by the authors. Submitted for possible open access publication under the terms and conditions of the Creative Commons Attribution (CC BY) license (<http://creativecommons.org/licenses/by/4.0/>).
